# Supplementary material for: Molecular investigation by whole exome sequencing revealed a high proportion of pathogenic variants among Thai victims of sudden unexpected death syndrome
Source: PLoS One. 2017 Jul 13;12(7):e0180056. doi: 10.1371/journal.pone.0180056 (PMC5509116; doi:10.1371/journal.pone.0180056)
Supplement: S1 Table — (XLSX) [file pone.0180056.s001.xlsx]

## Sheet: List of Candidate genes
Phenotype	Genes
Brugada’s syndrome or ventricular arrhythmia	SCN5A, CACNA1C, CACNB2, KCNE3, SCN1B, SCN3B, ANK2, CASQ2, KCNE1, KCNE2, KCNH2, KCNJ2, KCNQ1, CAV3, RYR2
Cardiac arrhythmia (not VT)	AKAP9, NKX2-5, SNTA1, DSC2, DSG2, DSP, GPD1L, HCN4, JUP, KCNJ5, KCNJ8, PKP2, RANGRF, SCN4B, TMEM43
Cardiomyopathy	ABCC9, ACTC1, ACTN2, ANKRD1, BAG3, BRAF, CRYAB, CSRP3, DES, DMD, DTNA, EMD, FKTN, GATAD1, GLA, HRAS, ILK, JPH2, KRAS, LAMA4, LAMP2, LDB3, LMNA, MAP2K1, MAP2K2, MTND1, MTND5, MTND6, MTTD, MTTG, MTTH, MTTI, MTTK, MTTL1, MTTL2, MTTM, MTTQ, MTTS1, MTTS2, MYBPC3, MYH7, MYL2, MYL3, MYLK2, MYOZ2, MYPN, NEBL, NEXN, NRAS, PDLIM3, PLN, PRKAG2, PTPN11, RAF1, RBM20, SGCD, SOS1, TAZ, TCAP, TMEM43, TMPO, TNNC1…
